# Supplementary material for: Effect of High-Flow Nasal Cannula versus Conventional Oxygen Therapy for Patients with Thoracoscopic Lobectomy after Extubation
Source: PubMed Central journal article supplement (PMC5337350; doi:10.1155/2017/7894631), 2017-02-19
Supplement: 7894631.f1.pdf [file 7894631.f1.pdf]

504

505 **Supplement 1. The Seven ARISCAT Risk Predictors and Points Assigned**

| <b>Item</b>                                    | <b>Score</b> |
|------------------------------------------------|--------------|
| <b>Age (yr)</b>                                |              |
| ≤50                                            | 0            |
| 51–80                                          | 3            |
| >80                                            | 16           |
| <b>Preoperative Spo2</b>                       |              |
| ≥96%                                           | 0            |
| 91–95%                                         | 8            |
| ≤90%                                           | 24           |
| <b>Respiratory infection in the last month</b> |              |
| No                                             | 0            |
| Yes                                            | 17           |
| <b>Preoperative anemia (Hb ≤10 g/dl)</b>       |              |
| No                                             | 0            |
| Yes                                            | 11           |
| <b>Surgical incision</b>                       |              |
| Peripheral                                     | 0            |
| Upper abdominal                                | 15           |
| Intrathoracic                                  | 24           |
| <b>Duration of surgery (h)</b>                 |              |
| <2                                             | 0            |
| 2–3                                            | 16           |
| >3                                             | 23           |
| <b>Emergency procedure</b>                     |              |
| No                                             | 0            |
| Yes                                            | 8            |

506 **Three levels of risk were indicated by the following cutoffs: <26 points, low**  
507 **risk; 26–44 points, moderate risk; and ≥45 points, high risk.**

508 **ARISCAT = Assess Respiratory Risk in Surgical Patients in Catalonia;**

509 **Hb = hemoglobin; Spo2 = arterial oxyhemoglobin saturation by pulse oximetry.**

510

511

512

513

514

515

516

517

518

519

520

521
